# Supplementary material for: CD73+ adipose-derived stem cells reduce scar formation through PLOD1
Source: PubMed Central journal article supplement — Ann Transl Med. 2022 Jan;10(2):66. doi: 10.21037/atm-21-6557 (PMC8848413; doi:10.21037/atm-21-6557), 2022-01
Supplement: atm-10-02-66-dss.pdf [file atm-10-02-66-dss.pdf]

## Data Sharing Statement

|                     |                                                                                                                                                     |                                                            |
|---------------------|-----------------------------------------------------------------------------------------------------------------------------------------------------|------------------------------------------------------------|
| <b>Article Info</b> | <a href="https://dx.doi.org/10.21037/atm-21-6557">https://dx.doi.org/10.21037/atm-21-6557</a>                                                       |                                                            |
| <b>Item</b>         | <b>Question</b>                                                                                                                                     | <b>Authors' Response<br/>(place "-" if not applicable)</b> |
| 1                   | Would you like to share data collected for your study to others?                                                                                    | No.                                                        |
| 2                   | If not, would you like to share the reason for your decision?                                                                                       | -                                                          |
| 3                   | What data in particular will be shared?                                                                                                             | -                                                          |
| 4                   | Any other documents will be shared? Such as study protocol, statistical analysis plan, informed consent form, clinical study report, analytic code. | Statistical analysis and experimental design.              |
| 5                   | When will data availability begin?                                                                                                                  | After publication.                                         |
| 6                   | When will data availability end?                                                                                                                    | 2 years.                                                   |
| 7                   | To whom will you share the data?                                                                                                                    | Researchers who have a shared interest.                    |
| 8                   | For what type of analysis or purpose?                                                                                                               | Upon discussion.                                           |
| 9                   | How or where can the data/documents be obtained?                                                                                                    | Please write to the corresponding author by ground mail.   |
| 10                  | Any other restrictions?                                                                                                                             | Public risk will be evaluated upon request.                |
